# Supplementary material for: Long-Term Exposure to Particulate Matter and Self-Reported Hypertension: A Prospective Analysis in the Nurses’ Health Study
Source: PubMed Central journal article supplement (PMC5010392; doi:10.1289/ehp163), 2016-05-13
Supplement: EHP163.s001.acco.pdf [file EHP163.s001.acco.pdf]

**Note to readers with disabilities:** *EHP* strives to ensure that all journal content is accessible to all readers. However, some figures and Supplemental Material published in *EHP* articles may not conform to [508 standards](#) due to the complexity of the information being presented. If you need assistance accessing journal content, please contact [ehp508@niehs.nih.gov](mailto:ehp508@niehs.nih.gov). Our staff will work with you to assess and meet your accessibility needs within 3 working days.

## **Supplemental Material**

### **Long-Term Exposure to Particulate Matter and Self-Reported Hypertension: A Prospective Analysis in the Nurses' Health Study**

Authors: Zhenyu Zhang, Francine Laden, John P. Forman, and Jaime E. Hart

#### **Table of Contents**

**Table S1.** HRs for Hypertension associated each 10  $\mu\text{g}/\text{m}^3$  increase in  $\text{PM}_{10}$ , stratified by age, diabetes, obesity, region, DASH score or latitude

**Table S2.** HRs for Hypertension associated with each 10  $\mu\text{g}/\text{m}^3$  increase in  $\text{PM}_{2.5-10}$ , stratified by age, diabetes, obesity, region, DASH score or latitude

**Table S1. HRs for Hypertension associated each 10  $\mu\text{g}/\text{m}^3$  increase in  $\text{PM}_{10}$ , stratified by age, diabetes, obesity, region, DASH score or latitude.**

| Effect Modifier    | Cases  | Person Years | 24-Month Average HR <sup>a</sup> (95%CI) | p-value for interaction | Cumulative Average HR <sup>a</sup> (95%CI) | p-value for interaction |
|--------------------|--------|--------------|------------------------------------------|-------------------------|--------------------------------------------|-------------------------|
| <b>Current Age</b> |        |              |                                          |                         |                                            |                         |
| < 65               | 20,823 | 657,012      | 1.04 (1.01, 1.06)                        | 0.03                    | 1.03 (1.01, 1.06)                          | 0.009                   |
| $\geq$ 65          | 15,989 | 303,030      | 1.00 (0.97, 1.03)                        |                         | 0.99 (0.96, 1.02)                          |                         |
| <b>Diabetes</b>    |        |              |                                          |                         |                                            |                         |
| No                 | 35,133 | 932,718      | 1.02 (1.00, 1.04)                        | 0.45                    | 1.02 (1.00, 1.04)                          | 0.87                    |
| Yes                | 1,679  | 27,323       | 1.05 (0.97, 1.14)                        |                         | 1.02 (0.95, 1.10)                          |                         |
| <b>Obesity</b>     |        |              |                                          |                         |                                            |                         |
| No                 | 28,551 | 822,549      | 1.01 (0.98, 1.03)                        | 0.001                   | 1.01 (0.99, 1.03)                          | 0.004                   |
| Yes                | 7,945  | 124,886      | 1.07 (1.04, 1.12)                        |                         | 1.06 (1.03, 1.10)                          |                         |
| <b>Region</b>      |        |              |                                          |                         |                                            |                         |
| Northeast          | 19,166 | 503,644      | 1.01 (0.98, 1.05)                        | 0.76                    | 1.01 (0.98, 1.04)                          | 0.85                    |
| Midwest            | 6,469  | 168,859      | 1.04 (0.99, 1.09)                        |                         | 1.03 (0.98, 1.08)                          |                         |
| West               | 4,801  | 130,349      | 1.02 (0.99, 1.05)                        |                         | 1.02 (0.99, 1.05)                          |                         |
| South              | 6,360  | 157,190      | 1.01 (0.94, 1.09)                        |                         | 1.00 (0.94, 1.07)                          |                         |
| <b>DASH</b>        |        |              |                                          |                         |                                            |                         |
| Q1                 | 6,760  | 166,548      | 1.04 (0.99, 1.08)                        | 0.87                    | 0.94 (0.91, 0.98)                          | 0.59                    |
| Q2                 | 6,125  | 153,693      | 1.01 (0.97, 1.06)                        |                         | 0.92 (0.88, 0.95)                          |                         |
| Q3                 | 6,854  | 173,833      | 1.01 (0.97, 1.05)                        |                         | 0.93 (0.90, 0.97)                          |                         |
| Q4                 | 5,780  | 151,900      | 1.02 (0.97, 1.06)                        |                         | 0.91 (0.88, 0.95)                          |                         |
| Q5                 | 5,819  | 159,579      | 1.03 (0.99, 1.07)                        |                         | 0.91 (0.88, 0.94)                          |                         |
| <b>Latitude</b>    |        |              |                                          |                         |                                            |                         |
| Low                | 6,643  | 169,691      | 1.04 (1.00, 1.08)                        | 0.46                    | 1.03 (1.00, 1.07)                          | 0.50                    |
| Middle             | 6,525  | 168,986      | 1.02 (0.98, 1.07)                        |                         | 1.02 (0.98, 1.06)                          |                         |
| High               | 23,644 | 621,365      | 1.01 (0.98, 1.04)                        |                         | 1.01 (0.98, 1.03)                          |                         |

<sup>a</sup> Adjusted for age, race, calendar year, region, BMI, DASH diet score, alcohol consumption, smoking status, physical activity, family history of hypertension, menopausal status, non-narcotic analgesic intake, statin use, diabetes, individual level socioeconomic status (educational attainment, marital status, partner's educational attainment, and parental employment), and Census tract median income and home value, as appropriate

**Table S2. HRs for Hypertension associated with each 10 µg/m<sup>3</sup> increase in PM<sub>2.5-10</sub>, stratified by age, diabetes, obesity, region, DASH score or latitude.**

| Effect Modifier    | Cases  | Person-Years | 24-Month Average HR <sup>a</sup> (95%CI) | p-value for interaction | Cumulative Average HR <sup>a</sup> (95%CI) | p-value for interaction |
|--------------------|--------|--------------|------------------------------------------|-------------------------|--------------------------------------------|-------------------------|
| <b>Current Age</b> |        |              |                                          |                         |                                            |                         |
| < 65               | 20,823 | 657,012      | 1.05 (1.01, 1.09)                        | 0.11                    | 1.04 (1.01, 1.08)                          | 0.13                    |
| ≥ 65               | 15,989 | 303,030      | 1.00 (0.96, 1.05)                        |                         | 1.01 (0.97, 1.05)                          |                         |
| <b>Diabetes</b>    |        |              |                                          |                         |                                            |                         |
| No                 | 35,133 | 932,718      | 1.03 (0.99, 1.06)                        | 0.76                    | 1.03 (1.00, 1.06)                          | 0.85                    |
| Yes                | 1,679  | 27,323       | 1.05 (0.93, 1.17)                        |                         | 1.02 (0.91, 1.14)                          |                         |
| <b>Obesity</b>     |        |              |                                          |                         |                                            |                         |
| No                 | 28,551 | 822,549      | 1.00 (0.97, 1.04)                        | <0.0001                 | 1.01 (0.98, 1.05)                          | 0.006                   |
| Yes                | 7,945  | 124,886      | 1.13 (1.07, 1.19)                        |                         | 1.09 (1.04, 1.15)                          |                         |
| <b>Region</b>      |        |              |                                          |                         |                                            |                         |
| Northeast          | 19,166 | 503,644      | 1.04 (0.97, 1.10)                        | 0.36                    | 1.03 (0.97, 1.08)                          | 0.83                    |
| Midwest            | 6,469  | 168,859      | 1.08 (1.00, 1.16)                        |                         | 1.04 (0.97, 1.12)                          |                         |
| West               | 4,801  | 130,349      | 1.03 (0.98, 1.07)                        |                         | 1.04 (0.99, 1.08)                          |                         |
| South              | 6,360  | 157,190      | 0.98 (0.90, 1.06)                        |                         | 0.99 (0.91, 1.08)                          |                         |
| <b>DASH</b>        |        |              |                                          |                         |                                            |                         |
| Q1                 | 6,760  | 166,548      | 1.07 (1.00, 1.13)                        | 0.48                    | 0.95 (0.90, 1.01)                          | 0.69                    |
| Q2                 | 6,125  | 153,693      | 1.03 (0.97, 1.10)                        |                         | 0.93 (0.87, 0.98)                          |                         |
| Q3                 | 6,854  | 173,833      | 0.99 (0.93, 1.05)                        |                         | 0.91 (0.86, 0.96)                          |                         |
| Q4                 | 5,780  | 151,900      | 1.03 (0.96, 1.09)                        |                         | 0.91 (0.86, 0.97)                          |                         |
| Q5                 | 5,819  | 159,579      | 1.02 (0.96, 1.08)                        |                         | 0.90 (0.85, 0.96)                          |                         |
| <b>Latitude</b>    |        |              |                                          |                         |                                            |                         |
| Low                | 6,643  | 169,691      | 1.05 (1.00, 1.11)                        | 0.88                    | 1.06 (1.01, 1.11)                          | 0.43                    |
| Middle             | 6,525  | 168,986      | 1.03 (0.98, 1.10)                        |                         | 1.04 (0.98, 1.10)                          |                         |
| High               | 23,644 | 621,365      | 1.04 (0.99, 1.10)                        |                         | 1.02 (0.97, 1.06)                          |                         |

<sup>a</sup> Adjusted for age, race, calendar year, region, BMI, DASH diet score, alcohol consumption, smoking status, physical activity, family history of hypertension, menopausal status, non-narcotic analgesic intake, statin use, diabetes, individual level socioeconomic status (educational attainment, marital status, partner's educational attainment, and parental employment), and Census tract median income and home value, as appropriate
